# Supplementary material for: Burn Them Right! Determining the Optimal Temperature for the Purification of Carbon Materials by Combustion
Source: MDPI journal article supplement (doi:10.3390/c8020031), 2022-05-24
Supplement: s1 [file s1]

Archive with 1 entries (1 files):
- carbon-1668718-supplementary.pdf
