# Supplementary material for: Burn Them Right! Determining the Optimal Temperature for the Purification of Carbon Materials by Combustion
Source: MDPI journal article supplement (doi:10.3390/c8020031), 2022-05-24
Supplement: s1 [file s1 › carbon-1668718-supplementary.pdf]

## Supplementary Materials for:

# Burn them right! Determining the optimal temperature for the purification of carbon materials by combustion

Emmanuel Picheau <sup>1</sup>, Ferdinand Hof <sup>1</sup>, Alain Derré <sup>1</sup>, Sara Amar <sup>1</sup>, Laure Noé <sup>2</sup>, Marc Monthieux <sup>2</sup>, and Alain Pénicaud <sup>1,\*</sup>

<sup>1</sup>Université de Bordeaux, CNRS, Centre de Recherche Paul Pascal, UMR5031, 33600 Pessac, France.

<sup>2</sup>CEMES, UPR8011-CNRS, Université de Toulouse, 29 rue Jeanne Marvig, 31055 Toulouse CEDEX 04, France.

\*Correspondence: alain.penicaud@crpp.cnrs.fr

Figure S1 shows the mean Raman spectra in the D and G band region of the material before and after treatment. The spectra have been normalized over the G band.

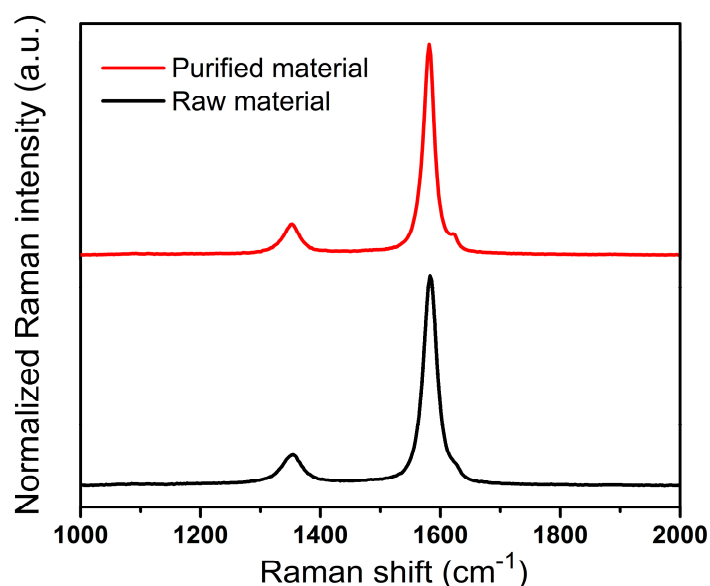

**Figure S1.** Normalized mean Raman spectra for D and G region of raw and treated materials.

Figure S2 shows the weight loss curve versus time (in blue), of 7.8 mg of raw material heated at a constant heating rate of 2.5 °C/min (green curve), *i.e.* identical to the heating rate value used in the CRTA program. The machine and gas conditions were identical to the ones in the CRTA measurement.

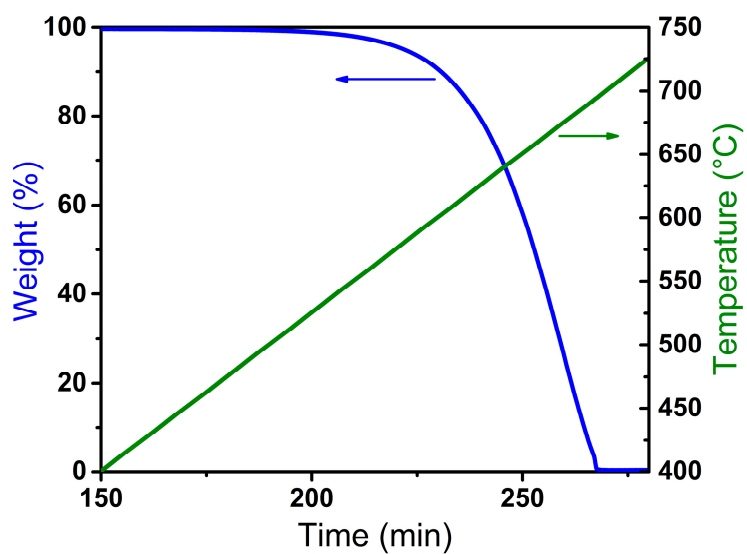

**Figure S2.** Thermogravimetric curve of the raw material in the classical approach of constant heating rate measurement (heating rate: 2.5 °C/min).
